# Supplementary material
Source: PubMed Central journal article supplement (PMC1472502)
Supplement: pnas_0510426103_4.pdf [file pnas_0510426103_4.pdf]

**Table 2.** Hot-spot\* residues of selected robust modes of *Thermus aquaticus* DNA polymerase I

| Mode # † | Residue numbers                                                                                                                                                                                                                                                                                                                              |
|----------|----------------------------------------------------------------------------------------------------------------------------------------------------------------------------------------------------------------------------------------------------------------------------------------------------------------------------------------------|
| 4        | 461, 464, 516, 532, 533, 537, 538, 541, 545, 570, 571, 590, 591, 610, 611, 612, 613, <b>614</b> ‡, 615, 616, 617, 619, 622, <b>626</b> , 632, 638, <b>666</b> , <b>667</b> , <b>669</b> , <b>670</b> , 672, 697, 720, 721, 723, 725, 747, 749, 754, 785, 809, 810, 812, 813, 814                                                             |
| 7        | 463, 464, 468, 506, 514, 515, 516, 532, 533, 537, 538, 541, 542, 545, 546, 584, 590, 591, 613, 615, 616, 617, 632, 637, 638, <b>662</b> , <b>664</b> , 665, <b>666</b> , <b>667</b> , 668, 672, 673, 692, 697, 745, 783, 816, 817, 818, 819, 820, 832                                                                                        |
| 10       | 613, 627, 628, 638, 642, 643, 655, <b>659</b> , <b>660</b> , <b>663</b> , <b>664</b> , <b>667</b> , <b>669</b> , <b>670</b> , 671, 672, 673, 675, <b>690</b> , 693, 694, <b>695</b> , <b>696</b> , <b>699</b> , 700, 704, <b>707</b> , <b>708</b> , 711, 727, 728, 729, 730, 731, 732, 733, 734, 737, 740, 741, 742, 743, 744, 745, 747, 748 |

\* The hot-spot residues that introduce most significant site-specific perturbation have high- $\delta\omega$  values. The details of the calculations are given in ref. 1.

† These modes describe allosteric transitions and are also robust to sequence variations.

‡ Residues in bold have already been experimentally identified to be significant.

1. Zheng, W., Brooks, B. R., Doniach, S. & Thirumalai, D. (2005) *Structure (London)* **13**, 565-577.
