# Supplementary material
Source: PubMed Central journal article supplement (PMC1472502)
Supplement: pnas_0510426103_6.pdf [file pnas_0510426103_6.pdf]

**Table 4.** Hot-spot\* residues of selected robust modes of *E. coli* GroEL chaperonin

| Mode # † | Residue numbers                                                                                                                                                                                                                                                                                                                                                                                                                                             |
|----------|-------------------------------------------------------------------------------------------------------------------------------------------------------------------------------------------------------------------------------------------------------------------------------------------------------------------------------------------------------------------------------------------------------------------------------------------------------------|
| 1        | <b>83</b> ‡, 141, 144, 161, 164, 165, 166, 167, 168, 169, 170, 171, 172, <b>173</b> ,<br><b>174</b> , 175, <b>176</b> , 177, 187, 188, <b>189</b> , <b>190</b> , <b>191</b> , 192, 193, <b>194</b> , 195, 288,<br>291, 295, <b>331</b> , 332, 333, 346, 347, 349, 352, 353, <b>359</b> , <b>360</b> , <b>361</b> , 363,<br>364, 365, <b>366</b> , 367, 368, 369, 370, <b>371</b> , 372, 373, 374, <b>375</b> , 376, 377,<br><b>378</b> , 379, 397, 400, 404 |

\* The hot-spot residues that introduce most significant site-specific perturbation have high- $\delta\omega$  values. The details of the calculations are given in ref. 1.

† These modes describe allosteric transitions and are also robust to sequence variations.

‡ Residues in bold have already been experimentally identified to be significant.

1. Zheng, W., Brooks, B. R., Doniach, S. & Thirumalai, D. (2005) *Structure (London)* **13**, 565-577.
