# Supplementary material
Source: PubMed Central journal article supplement (PMC1472502)

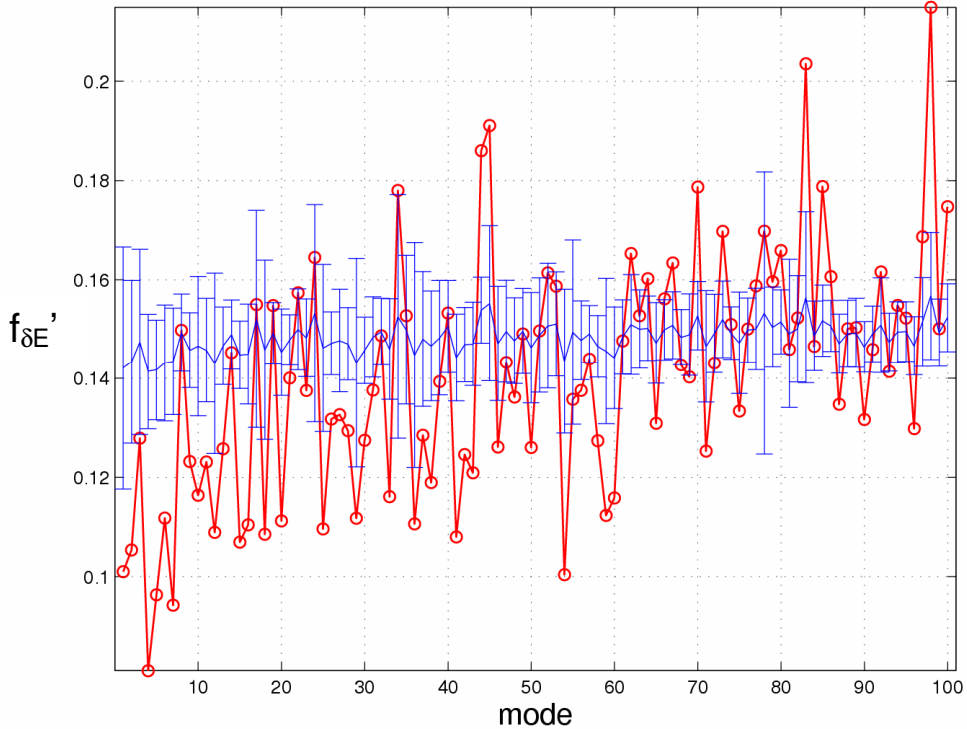

Supplement: pnas_0510426103_1.pdf [file pnas_0510426103_1.pdf]

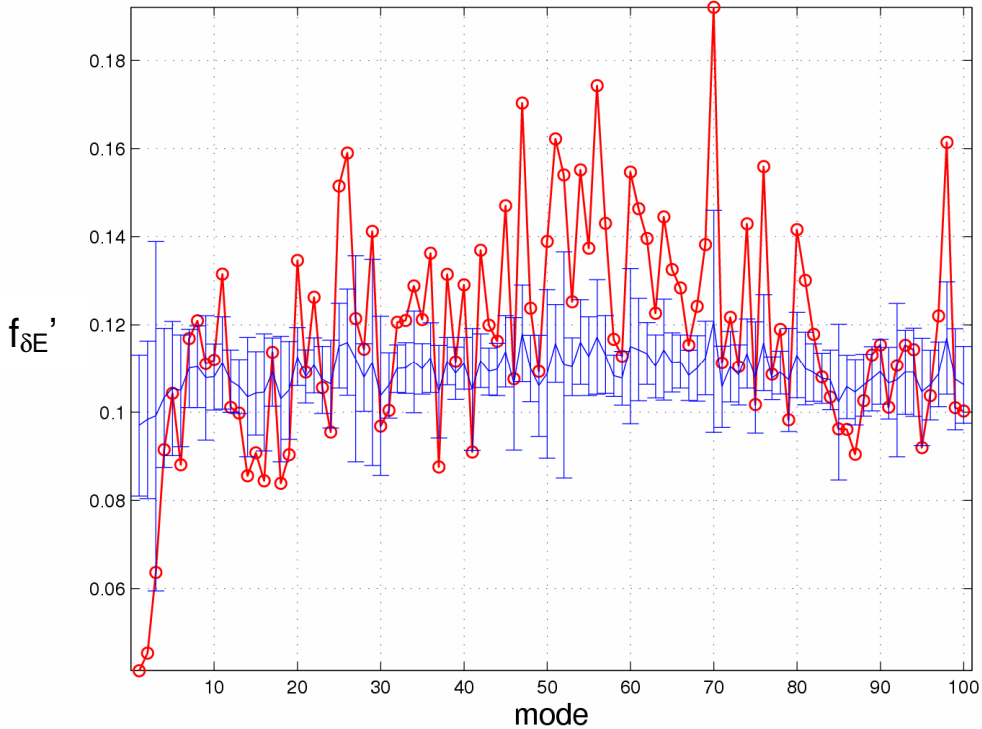

Supplement: pnas_0510426103_2.pdf [file pnas_0510426103_2.pdf]

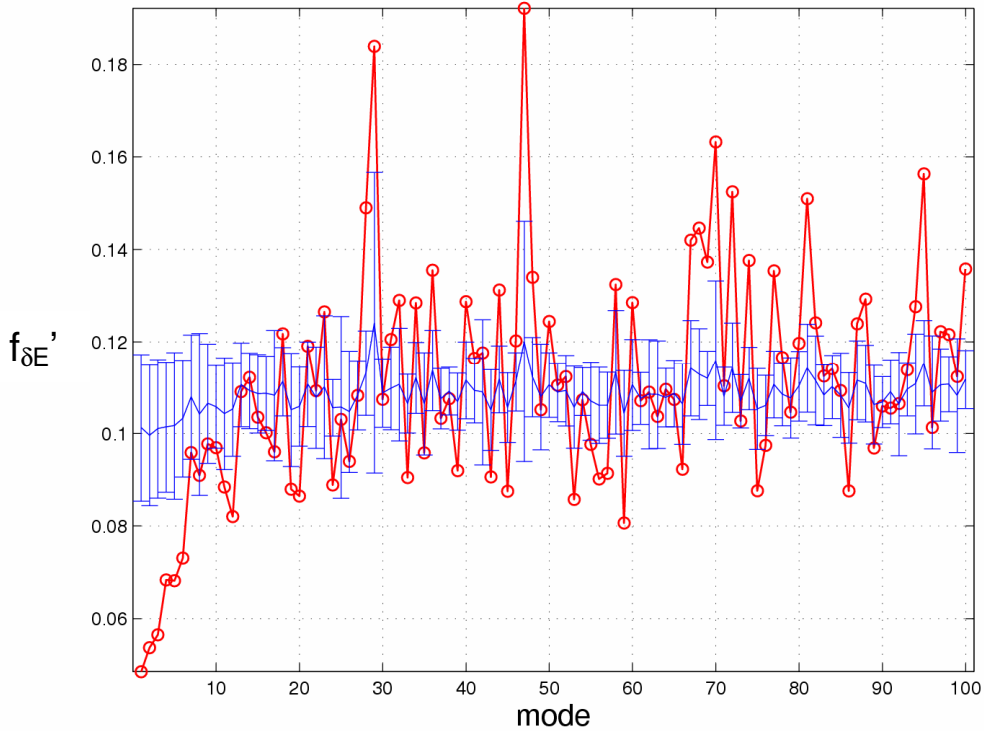

Supplement: pnas_0510426103_3.pdf [file pnas_0510426103_3.pdf]
